# Supplementary material
Source: HighWire-hosted journal article supplement (https://bmjopen.bmj.com/content/9/9/e029248)
Supplement: inline-supplementary-material-1 [file inline-supplementary-material-1.pdf]

## SUPPLEMENTARY TABLES

Supplementary Table 1. Model specifications and equations.

| Model | Equation ( $\log(p/(1-p))$ )                                                                                                                                        | Description                                                                                                                                                                                                                                                                                                                                                                                                                                                                                                                                        |
|-------|---------------------------------------------------------------------------------------------------------------------------------------------------------------------|----------------------------------------------------------------------------------------------------------------------------------------------------------------------------------------------------------------------------------------------------------------------------------------------------------------------------------------------------------------------------------------------------------------------------------------------------------------------------------------------------------------------------------------------------|
| 1     | $\beta_0 + \beta_1 X_{low} + \beta_2 X_{mid} + \beta_3 X_{high}$                                                                                                    | Single-point-in-time model. Independent variable is neighborhood deprivation at baseline, categorized as low, represented by $X_{low}$ (equal to 1 if exposed and 0 otherwise), middle, represented by $X_{mid}$ , or high, represented by $X_{high}$ .                                                                                                                                                                                                                                                                                            |
| 2     | $\Upsilon_0 + \Upsilon_1 X_1 + \Upsilon_2 X_2 + \Upsilon_3 X_3$                                                                                                     | Categorical accumulated model. Independent variable is number of exposed 5-year periods which is included as a categorical variable. Exposure during one period, (1,0,0), (0,1,0), or (0,0,1), is represented by $x_1$ , while exposure during two periods, (1,1,0), (0,1,1), or (1,0,1), is represented by $x_2$ , and exposure during all three periods, (1,1,1), by $x_3$ .                                                                                                                                                                     |
| S2a   | $\delta_0 + \delta_1 X_1$                                                                                                                                           | Sensitivity analysis A: Continuous accumulated model (5-year). Independent variable is number of exposed five-year periods which is included as a continuous variable. Represent a special case of Model 2 where $\Upsilon_1 = \Upsilon_2/2 = \Upsilon_3/3$ .                                                                                                                                                                                                                                                                                      |
| S2b   | $\beta_0 + \beta_{100} X_{100} + \beta_{010} X_{010} + \beta_{001} X_{001} + \beta_{110} X_{110} + \beta_{011} X_{011} + \beta_{101} X_{101} + \beta_{111} X_{111}$ | Sensitivity analysis B: Timing/period model. Independent variable is exposure during one period, (1,0,0), (0,1,0), and (0,0,1), represented by $X_{100}$ , $X_{010}$ , and $X_{001}$ respectively, exposure during two periods (1,1,0), (0,1,1), and (1,0,1), represented by $X_{110}$ , $X_{011}$ , and $X_{101}$ respectively and exposure during all three periods, (1,1,1), represented by $X_{111}$ . Model 2 is a special case of this model where $\beta_{100} = \beta_{010} = \beta_{001}$ and $\beta_{110} = \beta_{011} = \beta_{101}$ . |
| S2c   | $\zeta_0 + \zeta_1 X_1$                                                                                                                                             | Sensitivity analysis C: Continuous accumulated model (1-year). Independent variable is number of exposed one-year periods which is included as a continuous variable.                                                                                                                                                                                                                                                                                                                                                                              |

Supplementary Table 2a. Crude and adjusted logistic regression analyses, representing the single-point-in-time model (Model 1). Males.

|                             | <b>CHD 45 - 49</b> |                   | <b>CHD 50 - 54</b> |                   |
|-----------------------------|--------------------|-------------------|--------------------|-------------------|
|                             | Crude              | Adjusted          | Crude              | Adjusted          |
| Mid vs High                 | 1.29 (1.15; 1.45)  | 1.12 (0.99; 1.26) | 1.34 (1.24; 1.45)  | 1.18 (1.09; 1.28) |
| Low vs High                 | 1.81 (1.57; 2.08)  | 1.36 (1.17; 1.58) | 1.80 (1.64; 1.98)  | 1.42 (1.29; 1.57) |
| Unmarried vs married        |                    | 0.78 (0.71; 0.87) |                    | 0.84 (0.78; 0.90) |
| Divorced vs married         |                    | 0.83 (0.73; 0.96) |                    | 0.96 (0.88; 1.04) |
| Widowed vs married          |                    | 0.41 (0.13; 1.27) |                    | 0.96 (0.66; 1.40) |
| Psychiatric hospitalization |                    | 1.67 (1.46; 1.92) |                    | 1.40 (1.28; 1.54) |
| Education, middle vs low    |                    | 0.91 (0.82; 1.01) |                    | 0.86 (0.81; 0.92) |
| Education, high vs low      |                    | 0.71 (0.63; 0.81) |                    | 0.70 (0.64; 0.75) |
| Income Quartile 2 vs 1      |                    | 0.79 (0.70; 0.89) |                    | 0.84 (0.78; 0.91) |
| Income Quartile 3 vs 1      |                    | 0.62 (0.54; 0.71) |                    | 0.72 (0.65; 0.79) |
| Income Quartile 4 vs 1      |                    | 0.51 (0.44; 0.59) |                    | 0.59 (0.54; 0.65) |
| AIC                         | 25,515.2090        | 25,312.7398       | 52,384.3454        | 52,048.9794       |

  

|                             | <b>CHD 55 - 59</b> |                   | <b>CHD 60 - 64</b> |                   |
|-----------------------------|--------------------|-------------------|--------------------|-------------------|
|                             | Crude              | Adjusted          | Crude              | Adjusted          |
| Mid vs High                 | 1.14 (1.07; 1.21)  | 1.03 (0.97; 1.10) | 1.17 (1.12; 1.23)  | 1.08 (1.03; 1.13) |
| Low vs High                 | 1.51 (1.39; 1.63)  | 1.24 (1.14; 1.35) | 1.44 (1.36; 1.53)  | 1.22 (1.14; 1.30) |
| Unmarried vs married        |                    | 0.89 (0.83; 0.96) |                    | 0.89 (0.84; 0.94) |
| Divorced vs married         |                    | 0.97 (0.90; 1.05) |                    | 1.04 (0.99; 1.10) |
| Widowed vs married          |                    | 0.93 (0.74; 1.18) |                    | 0.99 (0.87; 1.12) |
| Psychiatric hospitalization |                    | 1.54 (1.43; 1.66) |                    | 1.46 (1.38; 1.55) |
| Education, middle vs low    |                    | 0.95 (0.90; 1.00) |                    | 0.93 (0.89; 0.97) |
| Education, high vs low      |                    | 0.80 (0.75; 0.86) |                    | 0.79 (0.75; 0.83) |
| Income Quartile 2 vs 1      |                    | 0.84 (0.78; 0.90) |                    | 0.86 (0.81; 0.90) |
| Income Quartile 3 vs 1      |                    | 0.72 (0.67; 0.79) |                    | 0.80 (0.75; 0.85) |
| Income Quartile 4 vs 1      |                    | 0.65 (0.60; 0.71) |                    | 0.70 (0.65; 0.74) |
| AIC                         | 65,901.7015        | 65,542.5041       | 109,998.1905       | 109,450.3708      |

|                             | <b>CHD 65 - 69</b> |                   | <b>CHD 70 - 74</b> |                   |
|-----------------------------|--------------------|-------------------|--------------------|-------------------|
|                             | Crude              | Adjusted          | Crude              | Adjusted          |
| Mid vs High                 | 1.14 (1.08; 1.20)  | 1.07 (1.01; 1.13) | 1.16 (1.10; 1.22)  | 1.11 (1.05; 1.17) |
| Low vs High                 | 1.36 (1.27; 1.46)  | 1.20 (1.12; 1.29) | 1.34 (1.26; 1.42)  | 1.24 (1.16; 1.32) |
| Unmarried vs married        |                    | 0.88 (0.81; 0.94) |                    | 1.07 (1.01; 1.13) |
| Divorced vs married         |                    | 1.03 (0.97; 1.09) |                    | 1.10 (1.05; 1.16) |
| Widowed vs married          |                    | 0.94 (0.84; 1.05) |                    | 1.03 (0.96; 1.12) |
| Psychiatric hospitalization |                    | 1.49 (1.39; 1.59) |                    | 1.46 (1.37; 1.56) |
| Education, middle vs low    |                    | 0.97 (0.93; 1.01) |                    | 0.95 (0.92; 0.99) |
| Education, high vs low      |                    | 0.84 (0.79; 0.88) |                    | 0.82 (0.78; 0.87) |
| Income Quartile 2 vs 1      |                    | 0.90 (0.85; 0.96) |                    |                   |
| Income Quartile 3 vs 1      |                    | 0.85 (0.79; 0.91) |                    |                   |
| Income Quartile 4 vs 1      |                    | 0.75 (0.69; 0.81) |                    |                   |
| AIC                         | 83,519.3134        | 83,227.1670       | 90,033.1678        | 89818.2465        |

  

|                             | <b>CHD 75 -79</b> |                   | <b>CHD 80 - 84</b> |                   |
|-----------------------------|-------------------|-------------------|--------------------|-------------------|
|                             | Crude             | Adjusted          | Crude              | Adjusted          |
| Mid vs High                 | 1.17 (1.10; 1.24) | 1.11 (1.05; 1.18) | 1.12 (1.06; 1.18)  | 1.07 (1.01; 1.13) |
| Low vs High                 | 1.30 (1.21; 1.39) | 1.20 (1.12; 1.29) | 1.19 (1.11; 1.28)  | 1.12 (1.05; 1.20) |
| Unmarried vs married        |                   | 1.08 (1.01; 1.15) |                    | 1.03 (0.97; 1.10) |
| Divorced vs married         |                   | 1.16 (1.09; 1.23) |                    | 1.05 (0.99; 1.12) |
| Widowed vs married          |                   | 1.17 (1.10; 1.25) |                    | 1.13 (1.08; 1.19) |
| Psychiatric hospitalization |                   | 1.20 (1.11; 1.29) |                    | 1.05 (0.96; 1.14) |
| Education, middle vs low    |                   | 0.93 (0.89; 0.98) |                    | 0.90 (0.86; 0.94) |
| Education, high vs low      |                   | 0.78 (0.74; 0.83) |                    | 0.76 (0.72; 0.81) |
| AIC                         | 73,736.9560       | 73,602.6644       | 75,449.3607        | 75,344.0899       |

Supplementary Table 2b. Crude and adjusted logistic regression analyses, representing the single-point-in-time model (Model 1). Females.

|                             | <b>CHD 45 - 49</b> |                   | <b>CHD 50 - 54</b> |                   |
|-----------------------------|--------------------|-------------------|--------------------|-------------------|
|                             | Crude              | Adjusted          | Crude              | Adjusted          |
| Mid vs High                 | 1.36 (1.15; 1.62)  | 1.18 (0.99; 1.40) | 1.28 (1.15; 1.44)  | 1.14 (1.01; 1.27) |
| Low vs High                 | 2.14 (1.75; 2.62)  | 1.56 (1.26; 1.92) | 1.91 (1.67; 2.18)  | 1.48 (1.29; 1.71) |
| Unmarried vs married        |                    | 0.75 (0.63; 0.88) |                    | 0.73 (0.64; 0.82) |
| Divorced vs married         |                    | 0.88 (0.73; 1.06) |                    | 0.92 (0.82; 1.04) |
| Widowed vs married          |                    | 1.56 (0.97; 2.53) |                    | 1.00 (0.75; 1.35) |
| Psychiatric hospitalization |                    | 2.02 (1.69; 2.42) |                    | 1.67 (1.47; 1.89) |
| Education, middle vs low    |                    | 0.77 (0.65; 0.91) |                    | 0.96 (0.86; 1.07) |
| Education, high vs low      |                    | 0.55 (0.46; 0.67) |                    | 0.72 (0.64; 0.81) |
| Income Quartile 2 vs 1      |                    | 0.77 (0.65; 0.92) |                    | 0.91 (0.81; 1.02) |
| Income Quartile 3 vs 1      |                    | 0.62 (0.51; 0.75) |                    | 0.71 (0.62; 0.82) |
| Income Quartile 4 vs 1      |                    | 0.54 (0.44; 0.67) |                    | 0.57 (0.49; 0.66) |
| AIC                         | 13,745.6490        | 13,587.9857       | 28,219.3374        | 27,992.9470       |

  

|                             | <b>CHD 55 - 59</b> |                   | <b>CHD 60 - 64</b> |                   |
|-----------------------------|--------------------|-------------------|--------------------|-------------------|
|                             | Crude              | Adjusted          | Crude              | Adjusted          |
| Mid vs High                 | 1.48 (1.34; 1.65)  | 1.28 (1.15; 1.42) | 1.29 (1.21; 1.39)  | 1.16 (1.08; 1.24) |
| Low vs High                 | 2.05 (1.81; 2.32)  | 1.52 (1.34; 1.74) | 1.79 (1.64; 1.95)  | 1.42 (1.30; 1.55) |
| Unmarried vs married        |                    | 0.78 (0.70; 0.88) |                    | 0.82 (0.74; 0.90) |
| Divorced vs married         |                    | 0.90 (0.81; 1.01) |                    | 0.88 (0.81; 0.95) |
| Widowed vs married          |                    | 0.87 (0.71; 1.07) |                    | 0.97 (0.87; 1.08) |
| Psychiatric hospitalization |                    | 1.56 (1.40; 1.75) |                    | 1.72 (1.59; 1.86) |
| Education, middle vs low    |                    | 0.79 (0.72; 0.86) |                    | 0.88 (0.83; 0.93) |
| Education, high vs low      |                    | 0.58 (0.52; 0.64) |                    | 0.78 (0.72; 0.83) |
| Income Quartile 2 vs 1      |                    | 0.83 (0.74; 0.92) |                    | 0.77 (0.72; 0.83) |
| Income Quartile 3 vs 1      |                    | 0.66 (0.58; 0.74) |                    | 0.64 (0.59; 0.70) |
| Income Quartile 4 vs 1      |                    | 0.53 (0.47; 0.61) |                    | 0.53 (0.48; 0.58) |
| AIC                         | 34,629.3027        | 34,277.0790       | 62,714.8844        | 62,174.8598       |

|                             | <b>CHD 65 - 69</b> |                   | <b>CHD 70 - 74</b> |                   |
|-----------------------------|--------------------|-------------------|--------------------|-------------------|
|                             | Crude              | Adjusted          | Crude              | Adjusted          |
| Mid vs High                 | 1.33 (1.24; 1.44)  | 1.22 (1.13; 1.32) | 1.17 (1.10; 1.24)  | 1.10 (1.04; 1.17) |
| Low vs High                 | 1.69 (1.54; 1.85)  | 1.43 (1.30; 1.57) | 1.38 (1.28; 1.48)  | 1.24 (1.15; 1.34) |
| Unmarried vs married        |                    | 0.89 (0.79; 0.99) |                    | 1.08 (0.99; 1.18) |
| Divorced vs married         |                    | 0.99 (0.92; 1.08) |                    | 1.24 (1.17; 1.31) |
| Widowed vs married          |                    | 0.97 (0.89; 1.07) |                    | 1.15 (1.09; 1.21) |
| Psychiatric hospitalization |                    | 1.45 (1.33; 1.58) |                    | 1.27 (1.18; 1.37) |
| Education, middle vs low    |                    | 0.93 (0.88; 0.98) |                    | 0.92 (0.87; 0.96) |
| Education, high vs low      |                    | 0.77 (0.72; 0.83) |                    | 0.73 (0.68; 0.78) |
| Income Quartile 2 vs 1      |                    | 0.87 (0.81; 0.94) |                    |                   |
| Income Quartile 3 vs 1      |                    | 0.75 (0.68; 0.82) |                    |                   |
| Income Quartile 4 vs 1      |                    | 0.64 (0.57; 0.72) |                    |                   |
| AIC                         | 55,564.0162        | 55,316.9682       | 73,206.5282        | 73,003.5487       |

|                             | <b>CHD 75 - 79</b> |                   | <b>CHD 80 - 84</b> |                   |
|-----------------------------|--------------------|-------------------|--------------------|-------------------|
|                             | Crude              | Adjusted          | Crude              | Adjusted          |
| Mid vs High                 | 1.16 (1.09; 1.23)  | 1.11 (1.05; 1.19) | 1.18 (1.12; 1.25)  | 1.15 (1.09; 1.21) |
| Low vs High                 | 1.31 (1.22; 1.41)  | 1.22 (1.13; 1.32) | 1.26 (1.18; 1.34)  | 1.20 (1.12; 1.28) |
| Unmarried vs married        |                    | 1.01 (0.92; 1.10) |                    | 1.04 (0.96; 1.12) |
| Divorced vs married         |                    | 1.19 (1.11; 1.26) |                    | 1.17 (1.10; 1.24) |
| Widowed vs married          |                    | 1.10 (1.06; 1.16) |                    | 1.12 (1.08; 1.17) |
| Psychiatric hospitalization |                    | 1.40 (1.30; 1.51) |                    | 1.23 (1.15; 1.31) |
| Education, middle vs low    |                    | 0.90 (0.86; 0.94) |                    | 0.94 (0.90; 0.98) |
| Education, high vs low      |                    | 0.80 (0.74; 0.85) |                    | 0.78 (0.73; 0.83) |
| AIC                         | 74,620.2392        | 74,455.6142       | 96,439.6481        | 96,295.1680       |

Supplementary Table 3a. Crude and adjusted logistic regression analyses based on longitudinal assessments of neighbourhood deprivation, representing the categorical accumulated model (Model 2), and sensitivity analyses A and B (S2a, and S2b). Males.

|                             | <i>CHD 45 – 49</i> |                    |                   |                   |
|-----------------------------|--------------------|--------------------|-------------------|-------------------|
|                             | Model 2 (crude)    | Model 2 (adjusted) | Model S2a *)      | Model S2b         |
| (1,0,0) vs. (0,0,0)         |                    |                    |                   |                   |
| (0,1,0) vs. (0,0,0)         | 1.20 (1.07; 1.35)  | 1.11 (0.98; 1.25)  | 1.09 (1.05; 1.13) | 1.00 (0.75; 1.32) |
| (0,0,1) vs. (0,0,0)         |                    |                    |                   | 1.21 (1.00; 1.48) |
| (1,1,0) vs. (0,0,0)         |                    |                    |                   | 1.09 (0.93; 1.28) |
| (1,0,1) vs. (0,0,0)         | 1.31 (1.16; 1.48)  | 1.15 (1.01; 1.30)  | 1.18 (1.10; 1.27) | 1.44 (1.09; 1.88) |
| (0,1,1) vs. (0,0,0)         |                    |                    |                   | 1.13 (0.90; 1.42) |
| (1,1,1) vs. (0,0,0)         | 1.58 (1.42; 1.76)  | 1.30 (1.16; 1.45)  | 1.29 (1.16; 1.43) | 1.30 (1.16; 1.45) |
| Unmarried vs married        |                    | 0.79 (0.71; 0.87)  | 0.79 (0.71; 0.87) | 0.79 (0.71; 0.87) |
| Divorced vs married         |                    | 0.83 (0.73; 0.96)  | 0.83 (0.73; 0.96) | 0.83 (0.73; 0.96) |
| Widowed vs married          |                    | 0.41 (0.13; 1.27)  | 0.41 (0.13; 1.27) | 0.41 (0.13; 1.27) |
| Psychiatric hospitalization |                    | 1.67 (1.45; 1.91)  | 1.67 (1.45; 1.91) | 1.66 (1.45; 1.91) |
| Education, middle vs low    |                    | 0.91 (0.82; 1.01)  | 0.91 (0.82; 1.01) | 0.91 (0.82; 1.01) |
| Education, high vs low      |                    | 0.71 (0.63; 0.80)  | 0.71 (0.63; 0.80) | 0.71 (0.63; 0.80) |
| Income Quartile 2 vs 1      |                    | 0.79 (0.71; 0.89)  | 0.79 (0.71; 0.89) | 0.80 (0.71; 0.90) |
| Income Quartile 3 vs 1      |                    | 0.62 (0.54; 0.71)  | 0.62 (0.54; 0.71) | 0.62 (0.54; 0.71) |
| Income Quartile 4 vs 1      |                    | 0.51 (0.44; 0.59)  | 0.51 (0.44; 0.59) | 0.51 (0.44; 0.59) |
| AIC                         | 25,514.3776        | 25,311.0253        | 25,307.4565       | 25,314.4190       |

\*) The OR for one period of exposure (1,0,0) vs. (0,0,0), (0,1,0) vs. (0,0,0), and (0,0,1) vs. (0,0,0) is represented by  $\exp(\delta_1)$  and the OR for two periods of exposure, (1,1,0) vs. (0,0,0), (1,0,1) vs. (0,0,0), and (0,1,1) vs. (0,0,0) is represented by  $\exp(2 \cdot \delta_1)$  and the OR for three periods of exposure, (1,1,1) vs. (0,0,0) is represented by  $\exp(3 \cdot \delta_1)$ .

|                             | <i>CHD 50 – 54</i> |                    |                         |                   |
|-----------------------------|--------------------|--------------------|-------------------------|-------------------|
|                             | Model 2 (crude)    | Model 2 (adjusted) | Model S2a <sup>*)</sup> | Model S2b         |
| (1,0,0) vs. (0,0,0)         |                    |                    |                         | 1.15 (1.03; 1.28) |
| (0,1,0) vs. (0,0,0)         | 1.35 (1.25; 1.46)  | 1.23 (1.14; 1.33)  | 1.10 (1.07; 1.12)       | 1.46 (1.23; 1.74) |
| (0,0,1) vs. (0,0,0)         |                    |                    |                         | 1.26 (1.11; 1.43) |
| (1,1,0) vs. (0,0,0)         |                    |                    |                         | 1.22 (1.09; 1.36) |
| (1,0,1) vs. (0,0,0)         | 1.45 (1.33; 1.57)  | 1.28 (1.17; 1.39)  | 1.20 (1.15; 1.26)       | 1.39 (1.14; 1.69) |
| (0,1,1) vs. (0,0,0)         |                    |                    |                         | 1.35 (1.18; 1.56) |
| (1,1,1) vs. (0,0,0)         | 1.52 (1.41; 1.63)  | 1.29 (1.20; 1.39)  | 1.32 (1.23; 1.41)       | 1.29 (1.20; 1.39) |
| Unmarried vs married        |                    | 0.84 (0.78; 0.90)  | 0.84 (0.78; 0.91)       | 0.84 (0.78; 0.90) |
| Divorced vs married         |                    | 0.95 (0.87; 1.04)  | 0.96 (0.88; 1.04)       | 0.95 (0.87; 1.03) |
| Widowed vs married          |                    | 0.97 (0.67; 1.41)  | 0.97 (0.67; 1.41)       | 0.97 (0.67; 1.41) |
| Psychiatric hospitalization |                    | 1.39 (1.27; 1.52)  | 1.39 (1.27; 1.53)       | 1.39 (1.27; 1.52) |
| Education, middle vs low    |                    | 0.86 (0.81; 0.92)  | 0.86 (0.81; 0.92)       | 0.86 (0.81; 0.92) |
| Education, high vs low      |                    | 0.69 (0.64; 0.75)  | 0.69 (0.64; 0.75)       | 0.69 (0.64; 0.75) |
| Income Quartile 2 vs 1      |                    | 0.84 (0.78; 0.92)  | 0.85 (0.78; 0.92)       | 0.85 (0.78; 0.92) |
| Income Quartile 3 vs 1      |                    | 0.72 (0.66; 0.79)  | 0.72 (0.66; 0.79)       | 0.72 (0.66; 0.79) |
| Income Quartile 4 vs 1      |                    | 0.60 (0.54; 0.66)  | 0.60 (0.54; 0.66)       | 0.60 (0.54; 0.66) |
| AIC                         | 52,356.9126        | 52,032.2160        | 52,039.0780             | 52,050.9515       |

<sup>\*)</sup> The OR for one period of exposure (1,0,0) vs. (0,0,0), (0,1,0) vs. (0,0,0), and (0,0,1) vs. (0,0,0) is represented by  $\exp(\delta_1)$  and the OR for two periods of exposure, (1,1,0) vs. (0,0,0), (1,0,1) vs. (0,0,0), and (0,1,1) vs. (0,0,0) is represented by  $\exp(2 \cdot \delta_1)$  and the OR for three periods of exposure, (1,1,1) vs. (0,0,0) is represented by  $\exp(3 \cdot \delta_1)$ .

| <i>CHD 55 – 59</i>          |                   |                    |                         |                   |
|-----------------------------|-------------------|--------------------|-------------------------|-------------------|
|                             | Model 2 (crude)   | Model 2 (adjusted) | Model S2a <sup>*)</sup> | Model S2b         |
| (1,0,0) vs. (0,0,0)         |                   |                    |                         | 1.10 (0.99; 1.21) |
| (0,1,0) vs. (0,0,0)         | 1.23 (1.15; 1.33) | 1.14 (1.06; 1.22)  | 1.07 (1.05; 1.09)       | 1.03 (0.86; 1.23) |
| (0,0,1) vs. (0,0,0)         |                   |                    |                         | 1.24 (1.11; 1.39) |
| (1,1,0) vs. (0,0,0)         |                   |                    |                         | 1.14 (1.03; 1.26) |
| (1,0,1) vs. (0,0,0)         | 1.30 (1.20; 1.40) | 1.16 (1.08; 1.26)  | 1.15 (1.10; 1.19)       | 1.34 (1.12; 1.61) |
| (0,1,1) vs. (0,0,0)         |                   |                    |                         | 1.13 (0.99; 1.28) |
| (1,1,1) vs. (0,0,0)         | 1.40 (1.31; 1.49) | 1.22 (1.14; 1.30)  | 1.23 (1.15; 1.30)       | 1.22 (1.14; 1.30) |
| Unmarried vs married        |                   | 0.89 (0.83; 0.96)  | 0.89 (0.83; 0.96)       | 0.89 (0.83; 0.95) |
| Divorced vs married         |                   | 0.97 (0.90; 1.05)  | 0.97 (0.90; 1.05)       | 0.97 (0.90; 1.04) |
| Widowed vs married          |                   | 0.93 (0.74; 1.18)  | 0.93 (0.74; 1.18)       | 0.93 (0.74; 1.18) |
| Psychiatric hospitalization |                   | 1.53 (1.42; 1.66)  | 1.53 (1.42; 1.66)       | 1.53 (1.42; 1.66) |
| Education, middle vs low    |                   | 0.95 (0.90; 1.01)  | 0.95 (0.90; 1.01)       | 0.95 (0.90; 1.01) |
| Education, high vs low      |                   | 0.81 (0.75; 0.86)  | 0.81 (0.75; 0.86)       | 0.81 (0.75; 0.86) |
| Income Quartile 2 vs 1      |                   | 0.84 (0.78; 0.90)  | 0.84 (0.78; 0.90)       | 0.84 (0.78; 0.90) |
| Income Quartile 3 vs 1      |                   | 0.73 (0.67; 0.79)  | 0.73 (0.67; 0.79)       | 0.73 (0.67; 0.79) |
| Income Quartile 4 vs 1      |                   | 0.66 (0.61; 0.72)  | 0.66 (0.61; 0.72)       | 0.66 (0.61; 0.72) |
| AIC                         | 65,874.3754       | 65,534.5155        | 65,533.5186             | 65,535.2344       |

<sup>\*)</sup> The OR for one period of exposure (1,0,0) vs. (0,0,0), (0,1,0) vs. (0,0,0), and (0,0,1) vs. (0,0,0) is represented by  $\exp(\delta_1)$  and the OR for two periods of exposure, (1,1,0) vs. (0,0,0), (1,0,1) vs. (0,0,0), and (0,1,1) vs. (0,0,0) is represented by  $\exp(2 \cdot \delta_1)$  and the OR for three periods of exposure, (1,1,1) vs. (0,0,0) is represented by  $\exp(3 \cdot \delta_1)$ .



| <i>CHD 60 – 64</i>          |                   |                    |                   |                   |
|-----------------------------|-------------------|--------------------|-------------------|-------------------|
|                             | Model 2 (crude)   | Model 2 (adjusted) | Model S2a *)      | Model S2b         |
| (1,0,0) vs. (0,0,0)         |                   |                    |                   | 1.09 (1.01; 1.18) |
| (0,1,0) vs. (0,0,0)         | 1.16 (1.10; 1.22) | 1.08 (1.02; 1.14)  | 1.06 (1.05; 1.08) | 1.14 (1.00; 1.29) |
| (0,0,1) vs. (0,0,0)         |                   |                    |                   | 1.03 (0.94; 1.13) |
| (1,1,0) vs. (0,0,0)         |                   |                    |                   | 1.12 (1.04; 1.21) |
| (1,0,1) vs. (0,0,0)         | 1.29 (1.22; 1.37) | 1.18 (1.11; 1.25)  | 1.13 (1.10; 1.17) | 1.36 (1.18; 1.56) |
| (0,1,1) vs. (0,0,0)         |                   |                    |                   | 1.20 (1.09; 1.32) |
| (1,1,1) vs. (0,0,0)         | 1.34 (1.27; 1.40) | 1.19 (1.13; 1.25)  | 1.20 (1.15; 1.26) | 1.19 (1.13; 1.25) |
| Unmarried vs married        |                   | 0.89 (0.84; 0.94)  | 0.89 (0.84; 0.94) | 0.89 (0.84; 0.94) |
| Divorced vs married         |                   | 1.04 (0.99; 1.10)  | 1.04 (0.99; 1.10) | 1.04 (0.99; 1.10) |
| Widowed vs married          |                   | 0.99 (0.87; 1.12)  | 0.99 (0.87; 1.12) | 0.99 (0.87; 1.12) |
| Psychiatric hospitalization |                   | 1.45 (1.37; 1.54)  | 1.45 (1.37; 1.54) | 1.45 (1.37; 1.54) |
| Education, middle vs low    |                   | 0.93 (0.90; 0.97)  | 0.93 (0.90; 0.97) | 0.93 (0.90; 0.97) |
| Education, high vs low      |                   | 0.79 (0.75; 0.83)  | 0.79 (0.75; 0.83) | 0.79 (0.75; 0.83) |
| Income Quartile 2 vs 1      |                   | 0.86 (0.82; 0.91)  | 0.86 (0.82; 0.91) | 0.86 (0.82; 0.91) |
| Income Quartile 3 vs 1      |                   | 0.81 (0.76; 0.86)  | 0.81 (0.76; 0.86) | 0.81 (0.76; 0.86) |
| Income Quartile 4 vs 1      |                   | 0.70 (0.66; 0.75)  | 0.70 (0.66; 0.75) | 0.70 (0.66; 0.75) |
| AIC                         | 109,954.7933      | 109,428.5881       | 109,427.2313      | 109,428.9021      |

\*) The OR for one period of exposure (1,0,0) vs. (0,0,0), (0,1,0) vs. (0,0,0), and (0,0,1) vs. (0,0,0) is represented by  $\exp(\delta_1)$  and the OR for two periods of exposure, (1,1,0) vs. (0,0,0), (1,0,1) vs. (0,0,0), and (0,1,1) vs. (0,0,0) is represented by  $\exp(2 \cdot \delta_1)$  and the OR for three periods of exposure, (1,1,1) vs. (0,0,0) is represented by  $\exp(3 \cdot \delta_1)$ .

| <i>CHD 65 – 69</i>          |                   |                    |                         |                   |
|-----------------------------|-------------------|--------------------|-------------------------|-------------------|
|                             | Model 2 (crude)   | Model 2 (adjusted) | Model S2a <sup>*)</sup> | Model S2b         |
| (1,0,0) vs. (0,0,0)         |                   |                    |                         | 1.06 (0.97; 1.16) |
| (0,1,0) vs. (0,0,0)         | 1.12 (1.05; 1.20) | 1.06 (0.99; 1.13)  | 1.04 (1.02; 1.06)       | 0.92 (0.78; 1.08) |
| (0,0,1) vs. (0,0,0)         |                   |                    |                         | 1.12 (1.01; 1.23) |
| (1,1,0) vs. (0,0,0)         |                   |                    |                         | 1.05 (0.96; 1.15) |
| (1,0,1) vs. (0,0,0)         | 1.15 (1.07; 1.23) | 1.07 (1.00; 1.14)  | 1.08 (1.04; 1.12)       | 1.09 (0.91; 1.30) |
| (0,1,1) vs. (0,0,0)         |                   |                    |                         | 1.09 (0.97; 1.22) |
| (1,1,1) vs. (0,0,0)         | 1.23 (1.17; 1.30) | 1.13 (1.07; 1.19)  | 1.12 (1.07; 1.19)       | 1.13 (1.07; 1.19) |
| Unmarried vs married        |                   | 0.88 (0.81; 0.94)  | 0.88 (0.81; 0.94)       | 0.88 (0.81; 0.94) |
| Divorced vs married         |                   | 1.03 (0.97; 1.09)  | 1.03 (0.97; 1.09)       | 1.03 (0.97; 1.09) |
| Widowed vs married          |                   | 0.94 (0.84; 1.05)  | 0.94 (0.84; 1.05)       | 0.94 (0.84; 1.05) |
| Psychiatric hospitalization |                   | 1.49 (1.39; 1.59)  | 1.49 (1.39; 1.59)       | 1.49 (1.39; 1.59) |
| Education, middle vs low    |                   | 0.97 (0.93; 1.01)  | 0.97 (0.93; 1.01)       | 0.97 (0.92; 1.01) |
| Education, high vs low      |                   | 0.83 (0.79; 0.88)  | 0.83 (0.79; 0.88)       | 0.83 (0.79; 0.88) |
| Income Quartile 2 vs 1      |                   | 0.90 (0.85; 0.96)  | 0.90 (0.85; 0.96)       | 0.90 (0.85; 0.96) |
| Income Quartile 3 vs 1      |                   | 0.85 (0.79; 0.91)  | 0.85 (0.79; 0.91)       | 0.85 (0.79; 0.91) |
| Income Quartile 4 vs 1      |                   | 0.75 (0.69; 0.81)  | 0.75 (0.69; 0.81)       | 0.75 (0.69; 0.81) |
| AIC                         | 83,531.4962       | 83,235.3757        | 83,231.8676             | 83,238.7180       |

<sup>\*)</sup> The OR for one period of exposure (1,0,0) vs. (0,0,0), (0,1,0) vs. (0,0,0), and (0,0,1) vs. (0,0,0) is represented by  $\exp(\delta_1)$  and the OR for two periods of exposure, (1,1,0) vs. (0,0,0), (1,0,1) vs. (0,0,0), and (0,1,1) vs. (0,0,0) is represented by  $\exp(2 \cdot \delta_1)$  and the OR for three periods of exposure, (1,1,1) vs. (0,0,0) is represented by  $\exp(3 \cdot \delta_1)$ .

| <i>CHD 70 – 74</i>          |                   |                    |                         |                   |
|-----------------------------|-------------------|--------------------|-------------------------|-------------------|
|                             | Model 2 (crude)   | Model 2 (adjusted) | Model S2a <sup>*)</sup> | Model S2b         |
| (1,0,0) vs. (0,0,0)         |                   |                    |                         | 1.02 (0.94; 1.11) |
| (0,1,0) vs. (0,0,0)         | 1.09 (1.03; 1.16) | 1.06 (1.00; 1.12)  | 1.05 (1.03; 1.07)       | 1.00 (0.86; 1.15) |
| (0,0,1) vs. (0,0,0)         |                   |                    |                         | 1.13 (1.04; 1.24) |
| (1,1,0) vs. (0,0,0)         |                   |                    |                         | 1.02 (0.94; 1.11) |
| (1,0,1) vs. (0,0,0)         | 1.06 (0.99; 1.13) | 1.01 (0.95; 1.08)  | 1.10 (1.07; 1.14)       | 1.17 (1.00; 1.36) |
| (0,1,1) vs. (0,0,0)         |                   |                    |                         | 0.95 (0.85; 1.05) |
| (1,1,1) vs. (0,0,0)         | 1.26 (1.20; 1.32) | 1.19 (1.13; 1.25)  | 1.16 (1.11; 1.21)       | 1.19 (1.13; 1.25) |
| Unmarried vs married        |                   | 1.07 (1.01; 1.13)  | 1.07 (1.01; 1.13)       | 1.07 (1.01; 1.13) |
| Divorced vs married         |                   | 1.10 (1.05; 1.16)  | 1.10 (1.05; 1.16)       | 1.10 (1.05; 1.16) |
| Widowed vs married          |                   | 1.04 (0.96; 1.12)  | 1.03 (0.96; 1.12)       | 1.03 (0.96; 1.12) |
| Psychiatric hospitalization |                   | 1.46 (1.37; 1.56)  | 1.46 (1.37; 1.56)       | 1.46 (1.37; 1.56) |
| Education, middle vs low    |                   | 0.95 (0.91; 0.99)  | 0.95 (0.92; 0.99)       | 0.95 (0.91; 0.99) |
| Education, high vs low      |                   | 0.82 (0.78; 0.86)  | 0.82 (0.78; 0.86)       | 0.82 (0.78; 0.86) |
| AIC                         | 90,032.4051       | 89,814.8284        | 89,820.4081             | 89,814.0974       |

<sup>\*)</sup> The OR for one period of exposure (1,0,0) vs. (0,0,0), (0,1,0) vs. (0,0,0), and (0,0,1) vs. (0,0,0) is represented by  $\exp(\delta_1)$  and the OR for two periods of exposure, (1,1,0) vs. (0,0,0), (1,0,1) vs. (0,0,0), and (0,1,1) vs. (0,0,0) is represented by  $\exp(2 \cdot \delta_1)$  and the OR for three periods of exposure, (1,1,1) vs. (0,0,0) is represented by  $\exp(3 \cdot \delta_1)$ .

| <i>CHD 75 – 79</i>          |                   |                    |                         |                   |
|-----------------------------|-------------------|--------------------|-------------------------|-------------------|
|                             | Model 2 (crude)   | Model 2 (adjusted) | Model S2a <sup>*)</sup> | Model S2b         |
| (1,0,0) vs. (0,0,0)         |                   |                    |                         | 1.03 (0.95; 1.13) |
| (0,1,0) vs. (0,0,0)         | 1.11 (1.04; 1.18) | 1.08 (1.01; 1.15)  | 1.03 (1.01; 1.05)       | 1.18 (1.02; 1.38) |
| (0,0,1) vs. (0,0,0)         |                   |                    |                         | 1.10 (1.00; 1.21) |
| (1,1,0) vs. (0,0,0)         |                   |                    |                         | 1.02 (0.93; 1.11) |
| (1,0,1) vs. (0,0,0)         | 1.05 (0.98; 1.12) | 1.01 (0.94; 1.08)  | 1.06 (1.03; 1.10)       | 1.13 (0.96; 1.34) |
| (0,1,1) vs. (0,0,0)         |                   |                    |                         | 0.95 (0.85; 1.07) |
| (1,1,1) vs. (0,0,0)         | 1.17 (1.11; 1.23) | 1.11 (1.06; 1.18)  | 1.10 (1.04; 1.16)       | 1.11 (1.06; 1.18) |
| Unmarried vs married        |                   | 1.08 (1.01; 1.15)  | 1.08 (1.01; 1.15)       | 1.08 (1.01; 1.15) |
| Divorced vs married         |                   | 1.16 (1.09; 1.23)  | 1.16 (1.09; 1.23)       | 1.16 (1.09; 1.23) |
| Widowed vs married          |                   | 1.17 (1.10; 1.25)  | 1.17 (1.10; 1.25)       | 1.17 (1.10; 1.25) |
| Psychiatric hospitalization |                   | 1.20 (1.11; 1.29)  | 1.20 (1.11; 1.29)       | 1.20 (1.11; 1.30) |
| Education, middle vs low    |                   | 0.93 (0.89; 0.97)  | 0.93 (0.89; 0.97)       | 0.93 (0.89; 0.97) |
| Education, high vs low      |                   | 0.77 (0.73; 0.82)  | 0.77 (0.73; 0.82)       | 0.77 (0.73; 0.82) |
| AIC                         | 73,754.2364       | 73,611.9161        | 73,613.1494             | 73,614.3535       |

<sup>\*)</sup> The OR for one period of exposure (1,0,0) vs. (0,0,0), (0,1,0) vs. (0,0,0), and (0,0,1) vs. (0,0,0) is represented by  $\exp(\delta_1)$  and the OR for two periods of exposure, (1,1,0) vs. (0,0,0), (1,0,1) vs. (0,0,0), and (0,1,1) vs. (0,0,0) is represented by  $\exp(2 \cdot \delta_1)$  and the OR for three periods of exposure, (1,1,1) vs. (0,0,0) is represented by  $\exp(3 \cdot \delta_1)$ .

| <i>CHD 80 – 84</i>          |                   |                    |                         |                   |
|-----------------------------|-------------------|--------------------|-------------------------|-------------------|
|                             | Model 2 (crude)   | Model 2 (adjusted) | Model S2a <sup>*)</sup> | Model S2b         |
| (1,0,0) vs. (0,0,0)         |                   |                    |                         | 1.07 (0.99; 1.16) |
| (0,1,0) vs. (0,0,0)         | 1.10 (1.04; 1.17) | 1.07 (1.01; 1.14)  | 1.02 (1.00; 1.03)       | 1.04 (0.89; 1.21) |
| (0,0,1) vs. (0,0,0)         |                   |                    |                         | 1.09 (1.00; 1.19) |
| (1,1,0) vs. (0,0,0)         |                   |                    |                         | 1.01 (0.92; 1.10) |
| (1,0,1) vs. (0,0,0)         | 1.05 (0.99; 1.12) | 1.02 (0.96; 1.09)  | 1.04 (1.00; 1.07)       | 1.11 (0.95; 1.31) |
| (0,1,1) vs. (0,0,0)         |                   |                    |                         | 1.01 (0.91; 1.13) |
| (1,1,1) vs. (0,0,0)         | 1.09 (1.04; 1.15) | 1.05 (1.00; 1.11)  | 1.05 (1.00; 1.11)       | 1.05 (1.00; 1.11) |
| Unmarried vs married        |                   | 1.03 (0.97; 1.10)  | 1.03 (0.97; 1.10)       | 1.03 (0.97; 1.10) |
| Divorced vs married         |                   | 1.05 (0.99; 1.13)  | 1.06 (0.99; 1.13)       | 1.06 (0.99; 1.13) |
| Widowed vs married          |                   | 1.13 (1.08; 1.19)  | 1.13 (1.08; 1.19)       | 1.13 (1.08; 1.19) |
| Psychiatric hospitalization |                   | 1.05 (0.96; 1.14)  | 1.05 (0.97; 1.14)       | 1.05 (0.96; 1.14) |
| Education, middle vs low    |                   | 0.90 (0.86; 0.94)  | 0.90 (0.86; 0.94)       | 0.90 (0.86; 0.94) |
| Education, high vs low      |                   | 0.76 (0.71; 0.81)  | 0.76 (0.71; 0.81)       | 0.76 (0.71; 0.81) |
| AIC                         | 75,459.1409       | 75,349.1122        | 75,348.7964             | 75,355.5722       |

<sup>\*)</sup> The OR for one period of exposure (1,0,0) vs. (0,0,0), (0,1,0) vs. (0,0,0), and (0,0,1) vs. (0,0,0) is represented by  $\exp(\delta_1)$  and the OR for two periods of exposure, (1,1,0) vs. (0,0,0), (1,0,1) vs. (0,0,0), and (0,1,1) vs. (0,0,0) is represented by  $\exp(2 \cdot \delta_1)$  and the OR for three periods of exposure, (1,1,1) vs. (0,0,0) is represented by  $\exp(3 \cdot \delta_1)$ .

Supplementary Table 3b. Crude and adjusted logistic regression analyses based on longitudinal assessments of neighbourhood deprivation, representing the categorical accumulated model (Model 2), and sensitivity analyses A and B (S2a, and S2b). Females.

|                             | <i>CHD 45 – 49</i> |                    |                   |                   |
|-----------------------------|--------------------|--------------------|-------------------|-------------------|
|                             | Model 2 (crude)    | Model 2 (adjusted) | Model S2a *)      | Model S2b         |
| (1,0,0) vs. (0,0,0)         |                    |                    |                   | 1.08 (0.86; 1.35) |
| (0,1,0) vs. (0,0,0)         | 1.24 (1.05; 1.47)  | 1.10 (0.93; 1.31)  | 1.08 (1.03; 1.14) | 0.97 (0.63; 1.48) |
| (0,0,1) vs. (0,0,0)         |                    |                    |                   | 1.21 (0.93; 1.58) |
| (1,1,0) vs. (0,0,0)         |                    |                    |                   | 0.83 (0.64; 1.08) |
| (1,0,1) vs. (0,0,0)         | 1.14 (0.93; 1.38)  | 0.95 (0.78; 1.16)  | 1.17 (1.06; 1.30) | 1.13 (0.73; 1.76) |
| (0,1,1) vs. (0,0,0)         |                    |                    |                   | 1.11 (0.80; 1.54) |
| (1,1,1) vs. (0,0,0)         | 1.72 (1.48; 2.01)  | 1.36 (1.16; 1.59)  | 1.27 (1.09; 1.49) | 1.36 (1.16; 1.60) |
| Unmarried vs married        |                    | 0.75 (0.63; 0.88)  | 0.75 (0.63; 0.88) | 0.75 (0.63; 0.88) |
| Divorced vs married         |                    | 0.89 (0.74; 1.07)  | 0.88 (0.73; 1.06) | 0.88 (0.73; 1.06) |
| Widowed vs married          |                    | 1.57 (0.97; 2.54)  | 1.56 (0.97; 2.53) | 1.57 (0.97; 2.54) |
| Psychiatric hospitalization |                    | 2.04 (1.70; 2.44)  | 2.03 (1.69; 2.43) | 2.03 (1.70; 2.43) |
| Education, middle vs low    |                    | 0.77 (0.65; 0.90)  | 0.76 (0.65; 0.90) | 0.77 (0.65; 0.91) |
| Education, high vs low      |                    | 0.54 (0.45; 0.66)  | 0.54 (0.45; 0.65) | 0.55 (0.45; 0.66) |
| Income Quartile 2 vs 1      |                    | 0.77 (0.64; 0.91)  | 0.77 (0.64; 0.91) | 0.77 (0.64; 0.91) |
| Income Quartile 3 vs 1      |                    | 0.61 (0.50; 0.75)  | 0.61 (0.50; 0.75) | 0.61 (0.50; 0.75) |
| Income Quartile 4 vs 1      |                    | 0.53 (0.43; 0.66)  | 0.53 (0.43; 0.66) | 0.53 (0.43; 0.66) |
| AIC                         | 13,759.0013        | 13,592.5468        | 13,595.2763       | 13,596.9268       |

\*) The OR for one period of exposure (1,0,0) vs. (0,0,0), (0,1,0) vs. (0,0,0), and (0,0,1) vs. (0,0,0) is represented by  $\exp(\delta_1)$  and the OR for two periods of exposure, (1,1,0) vs. (0,0,0), (1,0,1) vs. (0,0,0), and (0,1,1) vs. (0,0,0) is represented by  $\exp(2 \cdot \delta_1)$  and the OR for three periods of exposure, (1,1,1) vs. (0,0,0) is represented by  $\exp(3 \cdot \delta_1)$ .

| <i>CHD 50 – 54</i>          |                   |                    |                         |                   |
|-----------------------------|-------------------|--------------------|-------------------------|-------------------|
|                             | Model 2 (crude)   | Model 2 (adjusted) | Model S2a <sup>*)</sup> | Model S2b         |
| (1,0,0) vs. (0,0,0)         |                   |                    |                         | 1.16 (0.99; 1.37) |
| (0,1,0) vs. (0,0,0)         | 1.29 (1.15; 1.46) | 1.16 (1.03; 1.31)  | 1.14 (1.11; 1.18)       | 1.46 (1.14; 1.86) |
| (0,0,1) vs. (0,0,0)         |                   |                    |                         | 1.02 (0.84; 1.24) |
| (1,1,0) vs. (0,0,0)         |                   |                    |                         | 1.34 (1.15; 1.57) |
| (1,0,1) vs. (0,0,0)         | 1.55 (1.37; 1.75) | 1.34 (1.19; 1.52)  | 1.31 (1.22; 1.40)       | 1.36 (1.01; 1.84) |
| (0,1,1) vs. (0,0,0)         |                   |                    |                         | 1.33 (1.09; 1.63) |
| (1,1,1) vs. (0,0,0)         | 1.76 (1.59; 1.95) | 1.48 (1.33; 1.65)  | 1.50 (1.35; 1.66)       | 1.48 (1.33; 1.65) |
| Unmarried vs married        |                   | 0.72 (0.64; 0.81)  | 0.73 (0.64; 0.82)       | 0.73 (0.64; 0.82) |
| Divorced vs married         |                   | 0.90 (0.81; 1.00)  | 0.92 (0.81; 1.03)       | 0.92 (0.81; 1.03) |
| Widowed vs married          |                   | 0.97 (0.74; 1.27)  | 1.00 (0.75; 1.35)       | 1.00 (0.75; 1.35) |
| Psychiatric hospitalization |                   | 1.74 (1.55; 1.95)  | 1.65 (1.46; 1.87)       | 1.65 (1.46; 1.87) |
| Education, middle vs low    |                   | 0.92 (0.84; 1.02)  | 0.97 (0.87; 1.08)       | 0.97 (0.87; 1.08) |
| Education, high vs low      |                   | 0.69 (0.61; 0.77)  | 0.73 (0.64; 0.82)       | 0.73 (0.64; 0.82) |
| Income Quartile 2 vs 1      |                   | 0.94 (0.84; 1.04)  | 0.92 (0.82; 1.03)       | 0.92 (0.82; 1.03) |
| Income Quartile 3 vs 1      |                   | 0.75 (0.66; 0.85)  | 0.73 (0.64; 0.83)       | 0.73 (0.64; 0.83) |
| Income Quartile 4 vs 1      |                   | 0.59 (0.52; 0.68)  | 0.58 (0.51; 0.68)       | 0.59 (0.51; 0.68) |
| AIC                         | 28,180.1511       | 27,970.4615        | 27,966.7667             | 27,973.3480       |

<sup>\*)</sup> The OR for one period of exposure (1,0,0) vs. (0,0,0), (0,1,0) vs. (0,0,0), and (0,0,1) vs. (0,0,0) is represented by  $\exp(\delta_1)$  and the OR for two periods of exposure, (1,1,0) vs. (0,0,0), (1,0,1) vs. (0,0,0), and (0,1,1) vs. (0,0,0) is represented by  $\exp(2 \cdot \delta_1)$  and the OR for three periods of exposure, (1,1,1) vs. (0,0,0) is represented by  $\exp(3 \cdot \delta_1)$ .

| <i>CHD 55 – 59</i>          |                   |                    |                         |                   |
|-----------------------------|-------------------|--------------------|-------------------------|-------------------|
|                             | Model 2 (crude)   | Model 2 (adjusted) | Model S2a <sup>*)</sup> | Model S2b         |
| (1,0,0) vs. (0,0,0)         |                   |                    |                         | 1.21 (1.05; 1.40) |
| (0,1,0) vs. (0,0,0)         | 1.42 (1.28; 1.57) | 1.25 (1.12; 1.39)  | 1.11 (1.07; 1.14)       | 1.01 (0.78; 1.32) |
| (0,0,1) vs. (0,0,0)         |                   |                    |                         | 1.40 (1.20; 1.63) |
| (1,1,0) vs. (0,0,0)         |                   |                    |                         | 1.19 (1.02; 1.38) |
| (1,0,1) vs. (0,0,0)         | 1.44 (1.29; 1.61) | 1.23 (1.09; 1.37)  | 1.22 (1.15; 1.30)       | 1.40 (1.06; 1.84) |
| (0,1,1) vs. (0,0,0)         |                   |                    |                         | 1.23 (1.02; 1.48) |
| (1,1,1) vs. (0,0,0)         | 1.67 (1.52; 1.84) | 1.35 (1.22; 1.48)  | 1.35 (1.23; 1.48)       | 1.35 (1.22; 1.48) |
| Unmarried vs married        |                   | 0.79 (0.70; 0.88)  | 0.79 (0.70; 0.88)       | 0.79 (0.70; 0.88) |
| Divorced vs married         |                   | 0.90 (0.81; 1.00)  | 0.90 (0.81; 1.00)       | 0.90 (0.81; 1.00) |
| Widowed vs married          |                   | 0.87 (0.71; 1.07)  | 0.87 (0.71; 1.07)       | 0.87 (0.71; 1.07) |
| Psychiatric hospitalization |                   | 1.55 (1.39; 1.74)  | 1.55 (1.39; 1.74)       | 1.55 (1.39; 1.74) |
| Education, middle vs low    |                   | 0.79 (0.73; 0.86)  | 0.79 (0.73; 0.86)       | 0.79 (0.73; 0.86) |
| Education, high vs low      |                   | 0.58 (0.52; 0.64)  | 0.58 (0.52; 0.64)       | 0.58 (0.52; 0.64) |
| Income Quartile 2 vs 1      |                   | 0.83 (0.75; 0.92)  | 0.83 (0.75; 0.92)       | 0.83 (0.75; 0.92) |
| Income Quartile 3 vs 1      |                   | 0.67 (0.59; 0.75)  | 0.66 (0.59; 0.75)       | 0.67 (0.59; 0.75) |
| Income Quartile 4 vs 1      |                   | 0.54 (0.47; 0.61)  | 0.53 (0.47; 0.61)       | 0.54 (0.47; 0.62) |
| AIC                         | 34,617.2916       | 34,274.6482        | 34,275.9162             | 34,276.5675       |

<sup>\*)</sup> The OR for one period of exposure (1,0,0) vs. (0,0,0), (0,1,0) vs. (0,0,0), and (0,0,1) vs. (0,0,0) is represented by  $\exp(\delta_1)$  and the OR for two periods of exposure, (1,1,0) vs. (0,0,0), (1,0,1) vs. (0,0,0), and (0,1,1) vs. (0,0,0) is represented by  $\exp(2 \cdot \delta_1)$  and the OR for three periods of exposure, (1,1,1) vs. (0,0,0) is represented by  $\exp(3 \cdot \delta_1)$ .



| <i>CHD 60 – 64</i>          |                   |                    |                         |                   |
|-----------------------------|-------------------|--------------------|-------------------------|-------------------|
|                             | Model 2 (crude)   | Model 2 (adjusted) | Model S2a <sup>*)</sup> | Model S2b         |
| (1,0,0) vs. (0,0,0)         |                   |                    |                         | 1.23 (1.10; 1.36) |
| (0,1,0) vs. (0,0,0)         | 1.32 (1.23; 1.43) | 1.20 (1.11; 1.29)  | 1.10 (1.08; 1.12)       | 1.14 (0.94; 1.37) |
| (0,0,1) vs. (0,0,0)         |                   |                    |                         | 1.18 (1.05; 1.33) |
| (1,1,0) vs. (0,0,0)         |                   |                    |                         | 1.25 (1.13; 1.39) |
| (1,0,1) vs. (0,0,0)         | 1.44 (1.33; 1.56) | 1.26 (1.17; 1.37)  | 1.21 (1.16; 1.26)       | 1.14 (0.92; 1.42) |
| (0,1,1) vs. (0,0,0)         |                   |                    |                         | 1.33 (1.17; 1.51) |
| (1,1,1) vs. (0,0,0)         | 1.54 (1.44; 1.65) | 1.30 (1.22; 1.40)  | 1.33 (1.24; 1.42)       | 1.30 (1.22; 1.40) |
| Unmarried vs married        |                   | 0.82 (0.75; 0.90)  | 0.82 (0.74; 0.90)       | 0.82 (0.75; 0.90) |
| Divorced vs married         |                   | 0.87 (0.81; 0.94)  | 0.87 (0.81; 0.94)       | 0.87 (0.81; 0.94) |
| Widowed vs married          |                   | 0.97 (0.87; 1.08)  | 0.97 (0.87; 1.08)       | 0.97 (0.87; 1.08) |
| Psychiatric hospitalization |                   | 1.72 (1.59; 1.85)  | 1.72 (1.59; 1.85)       | 1.72 (1.59; 1.85) |
| Education, middle vs low    |                   | 0.89 (0.84; 0.94)  | 0.89 (0.84; 0.94)       | 0.89 (0.84; 0.94) |
| Education, high vs low      |                   | 0.78 (0.73; 0.83)  | 0.78 (0.73; 0.83)       | 0.78 (0.73; 0.83) |
| Income Quartile 2 vs 1      |                   | 0.78 (0.72; 0.84)  | 0.78 (0.72; 0.83)       | 0.78 (0.72; 0.84) |
| Income Quartile 3 vs 1      |                   | 0.65 (0.60; 0.71)  | 0.65 (0.60; 0.71)       | 0.65 (0.60; 0.71) |
| Income Quartile 4 vs 1      |                   | 0.53 (0.48; 0.59)  | 0.53 (0.48; 0.59)       | 0.53 (0.48; 0.59) |
| AIC                         | 62,680.5331       | 62,160.3900        | 62,162.7564             | 62,166.2798       |

<sup>\*)</sup> The OR for one period of exposure (1,0,0) vs. (0,0,0), (0,1,0) vs. (0,0,0), and (0,0,1) vs. (0,0,0) is represented by  $\exp(\delta_1)$  and the OR for two periods of exposure, (1,1,0) vs. (0,0,0), (1,0,1) vs. (0,0,0), and (0,1,1) vs. (0,0,0) is represented by  $\exp(2 \cdot \delta_1)$  and the OR for three periods of exposure, (1,1,1) vs. (0,0,0) is represented by  $\exp(3 \cdot \delta_1)$ .

| <i>CHD 65 – 69</i>          |                   |                    |                         |                   |
|-----------------------------|-------------------|--------------------|-------------------------|-------------------|
|                             | Model 2 (crude)   | Model 2 (adjusted) | Model S2a <sup>*)</sup> | Model S2b         |
| (1,0,0) vs. (0,0,0)         |                   |                    |                         | 1.05 (0.93; 1.19) |
| (0,1,0) vs. (0,0,0)         | 1.22 (1.12; 1.32) | 1.13 (1.04; 1.23)  | 1.09 (1.06; 1.11)       | 1.42 (1.18; 1.70) |
| (0,0,1) vs. (0,0,0)         |                   |                    |                         | 1.11 (0.98; 1.26) |
| (1,1,0) vs. (0,0,0)         |                   |                    |                         | 1.12 (1.00; 1.26) |
| (1,0,1) vs. (0,0,0)         | 1.25 (1.14; 1.36) | 1.14 (1.04; 1.25)  | 1.18 (1.13; 1.23)       | 1.06 (0.84; 1.34) |
| (0,1,1) vs. (0,0,0)         |                   |                    |                         | 1.20 (1.04; 1.38) |
| (1,1,1) vs. (0,0,0)         | 1.45 (1.35; 1.55) | 1.29 (1.20; 1.38)  | 1.28 (1.20; 1.37)       | 1.29 (1.20; 1.38) |
| Unmarried vs married        |                   | 0.89 (0.79; 0.99)  | 0.89 (0.79; 0.99)       | 0.89 (0.79; 0.99) |
| Divorced vs married         |                   | 0.99 (0.91; 1.07)  | 0.99 (0.91; 1.07)       | 0.99 (0.91; 1.07) |
| Widowed vs married          |                   | 0.98 (0.89; 1.07)  | 0.98 (0.89; 1.07)       | 0.97 (0.89; 1.07) |
| Psychiatric hospitalization |                   | 1.44 (1.32; 1.57)  | 1.44 (1.32; 1.57)       | 1.44 (1.32; 1.57) |
| Education, middle vs low    |                   | 0.93 (0.88; 0.98)  | 0.93 (0.88; 0.98)       | 0.93 (0.88; 0.98) |
| Education, high vs low      |                   | 0.77 (0.72; 0.83)  | 0.77 (0.72; 0.83)       | 0.77 (0.72; 0.83) |
| Income Quartile 2 vs 1      |                   | 0.88 (0.81; 0.94)  | 0.88 (0.81; 0.94)       | 0.88 (0.81; 0.94) |
| Income Quartile 3 vs 1      |                   | 0.75 (0.68; 0.82)  | 0.75 (0.68; 0.82)       | 0.75 (0.68; 0.82) |
| Income Quartile 4 vs 1      |                   | 0.64 (0.57; 0.72)  | 0.64 (0.57; 0.72)       | 0.64 (0.57; 0.72) |
| AIC                         | 55,570.6879       | 55,321.4237        | 55,319.1180             | 55,321.1026       |

<sup>\*)</sup> The OR for one period of exposure (1,0,0) vs. (0,0,0), (0,1,0) vs. (0,0,0), and (0,0,1) vs. (0,0,0) is represented by  $\exp(\delta_1)$  and the OR for two periods of exposure, (1,1,0) vs. (0,0,0), (1,0,1) vs. (0,0,0), and (0,1,1) vs. (0,0,0) is represented by  $\exp(2 \cdot \delta_1)$  and the OR for three periods of exposure, (1,1,1) vs. (0,0,0) is represented by  $\exp(3 \cdot \delta_1)$ .

| <i>CHD 70 – 74</i>          |                   |                    |                   |                   |
|-----------------------------|-------------------|--------------------|-------------------|-------------------|
|                             | Model 2 (crude)   | Model 2 (adjusted) | Model S2a *)      | Model S2b         |
| (1,0,0) vs. (0,0,0)         |                   |                    |                   | 1.28 (1.17; 1.40) |
| (0,1,0) vs. (0,0,0)         | 1.27 (1.19; 1.36) | 1.22 (1.14; 1.30)  | 1.06 (1.04; 1.08) | 1.23 (1.06; 1.44) |
| (0,0,1) vs. (0,0,0)         |                   |                    |                   | 1.15 (1.04; 1.27) |
| (1,1,0) vs. (0,0,0)         |                   |                    |                   | 1.12 (1.02; 1.24) |
| (1,0,1) vs. (0,0,0)         | 1.29 (1.21; 1.38) | 1.23 (1.14; 1.32)  | 1.13 (1.09; 1.17) | 1.47 (1.24; 1.74) |
| (0,1,1) vs. (0,0,0)         |                   |                    |                   | 1.30 (1.16; 1.45) |
| (1,1,1) vs. (0,0,0)         | 1.25 (1.18; 1.32) | 1.17 (1.10; 1.24)  | 1.20 (1.14; 1.27) | 1.17 (1.10; 1.24) |
| Unmarried vs married        |                   | 1.06 (0.97; 1.16)  | 1.08 (0.98; 1.18) | 1.08 (0.98; 1.18) |
| Divorced vs married         |                   | 1.23 (1.16; 1.29)  | 1.24 (1.17; 1.31) | 1.23 (1.17; 1.31) |
| Widowed vs married          |                   | 1.14 (1.08; 1.20)  | 1.15 (1.09; 1.21) | 1.14 (1.08; 1.20) |
| Psychiatric hospitalization |                   | 1.26 (1.17; 1.35)  | 1.27 (1.17; 1.37) | 1.27 (1.17; 1.37) |
| Education, middle vs low    |                   | 0.90 (0.86; 0.94)  | 0.92 (0.88; 0.96) | 0.92 (0.88; 0.96) |
| Education, high vs low      |                   | 0.72 (0.67; 0.76)  | 0.73 (0.69; 0.78) | 0.73 (0.69; 0.78) |
| AIC                         | 73,162.3138       | 72,968.0844        | 72,988.6098       | 72,964.1887       |

\*) The OR for one period of exposure (1,0,0) vs. (0,0,0), (0,1,0) vs. (0,0,0), and (0,0,1) vs. (0,0,0) is represented by  $\exp(\delta_1)$  and the OR for two periods of exposure, (1,1,0) vs. (0,0,0), (1,0,1) vs. (0,0,0), and (0,1,1) vs. (0,0,0) is represented by  $\exp(2 \cdot \delta_1)$  and the OR for three periods of exposure, (1,1,1) vs. (0,0,0) is represented by  $\exp(3 \cdot \delta_1)$ .

| <b>CHD 75 – 79</b>          |                   |                    |                   |                   |
|-----------------------------|-------------------|--------------------|-------------------|-------------------|
|                             | Model 2 (crude)   | Model 2 (adjusted) | Model S2a *)      | Model S2b         |
| (1,0,0) vs. (0,0,0)         |                   |                    |                   | 1.10 (1.00; 1.20) |
| (0,1,0) vs. (0,0,0)         | 1.17 (1.10; 1.25) | 1.14 (1.07; 1.22)  | 1.05 (1.03; 1.07) | 1.09 (0.92; 1.28) |
| (0,0,1) vs. (0,0,0)         |                   |                    |                   | 1.22 (1.11; 1.34) |
| (1,1,0) vs. (0,0,0)         |                   |                    |                   | 1.20 (1.09; 1.31) |
| (1,0,1) vs. (0,0,0)         | 1.22 (1.14; 1.30) | 1.18 (1.10; 1.26)  | 1.11 (1.07; 1.15) | 1.12 (0.94; 1.34) |
| (0,1,1) vs. (0,0,0)         |                   |                    |                   | 1.18 (1.06; 1.32) |
| (1,1,1) vs. (0,0,0)         | 1.19 (1.13; 1.26) | 1.14 (1.08; 1.20)  | 1.17 (1.11; 1.23) | 1.14 (1.08; 1.20) |
| Unmarried vs married        |                   | 1.01 (0.92; 1.10)  | 1.01 (0.92; 1.10) | 1.01 (0.92; 1.10) |
| Divorced vs married         |                   | 1.18 (1.11; 1.26)  | 1.18 (1.11; 1.26) | 1.18 (1.11; 1.26) |
| Widowed vs married          |                   | 1.10 (1.05; 1.16)  | 1.11 (1.06; 1.16) | 1.10 (1.05; 1.15) |
| Psychiatric hospitalization |                   | 1.39 (1.29; 1.50)  | 1.40 (1.30; 1.50) | 1.39 (1.29; 1.50) |
| Education, middle vs low    |                   | 0.90 (0.86; 0.95)  | 0.90 (0.86; 0.95) | 0.90 (0.86; 0.95) |
| Education, high vs low      |                   | 0.80 (0.74; 0.85)  | 0.79 (0.74; 0.85) | 0.80 (0.74; 0.85) |
| AIC                         | 74,603.2821       | 74,440.9304        | 74,447.9954       | 74,445.4397       |

\*) The OR for one period of exposure (1,0,0) vs. (0,0,0), (0,1,0) vs. (0,0,0), and (0,0,1) vs. (0,0,0) is represented by  $\exp(\delta_1)$  and the OR for two periods of exposure, (1,1,0) vs. (0,0,0), (1,0,1) vs. (0,0,0), and (0,1,1) vs. (0,0,0) is represented by  $\exp(2 \cdot \delta_1)$  and the OR for three periods of exposure, (1,1,1) vs. (0,0,0) is represented by  $\exp(3 \cdot \delta_1)$ .

| <i>CHD 80 – 84</i>          |                   |                    |                         |                   |
|-----------------------------|-------------------|--------------------|-------------------------|-------------------|
|                             | Model 2 (crude)   | Model 2 (adjusted) | Model S2a <sup>*)</sup> | Model S2b         |
| (1,0,0) vs. (0,0,0)         |                   |                    |                         | 1.06 (0.98; 1.14) |
| (0,1,0) vs. (0,0,0)         | 1.09 (1.03; 1.15) | 1.06 (1.01; 1.12)  | 1.04 (1.02; 1.05)       | 1.07 (0.93; 1.23) |
| (0,0,1) vs. (0,0,0)         |                   |                    |                         | 1.07 (0.99; 1.16) |
| (1,1,0) vs. (0,0,0)         |                   |                    |                         | 1.18 (1.10; 1.28) |
| (1,0,1) vs. (0,0,0)         | 1.12 (1.06; 1.19) | 1.10 (1.04; 1.16)  | 1.08 (1.05; 1.11)       | 1.10 (0.95; 1.27) |
| (0,1,1) vs. (0,0,0)         |                   |                    |                         | 0.98 (0.89; 1.08) |
| (1,1,1) vs. (0,0,0)         | 1.14 (1.09; 1.20) | 1.11 (1.06; 1.16)  | 1.12 (1.07; 1.17)       | 1.11 (1.06; 1.16) |
| Unmarried vs married        |                   | 1.05 (0.97; 1.13)  | 1.05 (0.97; 1.13)       | 1.05 (0.97; 1.13) |
| Divorced vs married         |                   | 1.16 (1.10; 1.24)  | 1.16 (1.10; 1.24)       | 1.17 (1.10; 1.24) |
| Widowed vs married          |                   | 1.13 (1.08; 1.17)  | 1.13 (1.08; 1.17)       | 1.13 (1.08; 1.17) |
| Psychiatric hospitalization |                   | 1.23 (1.15; 1.31)  | 1.23 (1.15; 1.31)       | 1.23 (1.15; 1.31) |
| Education, middle vs low    |                   | 0.94 (0.90; 0.98)  | 0.94 (0.90; 0.98)       | 0.94 (0.90; 0.98) |
| Education, high vs low      |                   | 0.77 (0.72; 0.82)  | 0.77 (0.72; 0.82)       | 0.77 (0.72; 0.83) |
| AIC                         | 96,450.6443       | 96,303.4624        | 96,300.8734             | 96,301.8523       |

<sup>\*)</sup> The OR for one period of exposure (1,0,0) vs. (0,0,0), (0,1,0) vs. (0,0,0), and (0,0,1) vs. (0,0,0) is represented by  $\exp(\delta_1)$  and the OR for two periods of exposure, (1,1,0) vs. (0,0,0), (1,0,1) vs. (0,0,0), and (0,1,1) vs. (0,0,0) is represented by  $\exp(2 \cdot \delta_1)$  and the OR for three periods of exposure, (1,1,1) vs. (0,0,0) is represented by  $\exp(3 \cdot \delta_1)$ .

Supplementary Table 4a. Adjusted logistic regression analyses representing sensitivity C (Model S2c). Males.

|                             | <b>CHD 45 - 49</b> | <b>CHD 50 - 54</b> | <b>CHD 55 - 59</b> | <b>CHD 60 - 64</b> |
|-----------------------------|--------------------|--------------------|--------------------|--------------------|
|                             | Model S2c          | Model S2c          | Model S2c          | Model S2c          |
| By number of periods        | 1.02 (1.01; 1.03)  | 1.02 (1.02; 1.03)  | 1.02 (1.01; 1.02)  | 1.01 (1.01; 1.02)  |
| Unmarried vs married        | 0.79 (0.71; 0.88)  | 0.84 (0.78; 0.91)  | 0.89 (0.83; 0.96)  | 0.89 (0.84; 0.94)  |
| Divorced vs married         | 0.84 (0.73; 0.96)  | 0.96 (0.88; 1.05)  | 0.98 (0.91; 1.05)  | 1.04 (0.99; 1.10)  |
| Widowed vs married          | 0.41 (0.13; 1.27)  | 0.97 (0.67; 1.40)  | 0.93 (0.74; 1.18)  | 0.99 (0.87; 1.12)  |
| Psychiatric hospitalization | 1.67 (1.46; 1.92)  | 1.40 (1.28; 1.53)  | 1.54 (1.42; 1.66)  | 1.46 (1.37; 1.54)  |
| Education, middle vs low    | 0.91 (0.82; 1.01)  | 0.86 (0.81; 0.92)  | 0.95 (0.90; 1.00)  | 0.93 (0.89; 0.97)  |
| Education, high vs low      | 0.71 (0.63; 0.80)  | 0.69 (0.64; 0.74)  | 0.80 (0.75; 0.86)  | 0.79 (0.75; 0.83)  |
| Income Quartile 2 vs 1      | 0.79 (0.71; 0.89)  | 0.84 (0.78; 0.91)  | 0.84 (0.78; 0.90)  | 0.86 (0.82; 0.91)  |
| Income Quartile 3 vs 1      | 0.62 (0.54; 0.71)  | 0.72 (0.66; 0.79)  | 0.73 (0.67; 0.79)  | 0.80 (0.76; 0.85)  |
| Income Quartile 4 vs 1      | 0.51 (0.44; 0.59)  | 0.59 (0.53; 0.65)  | 0.66 (0.60; 0.72)  | 0.70 (0.65; 0.75)  |
| AIC                         | 25,307.1331        | 52,039.0780        | 65,540.7682        | 109,437.8983       |

  

|                             | <b>CHD 65 - 69</b> | <b>CHD 70 - 74</b> | <b>CHD 75 - 80</b> | <b>CHD 80 - 84</b> |
|-----------------------------|--------------------|--------------------|--------------------|--------------------|
|                             | Model S2c          | Model S2c          | Model S2c          | Model S2c          |
| By number of periods        | 1.01 (1.01; 1.01)  | 1.01 (1.01; 1.02)  | 1.01 (1.01; 1.01)  | 1.01 (1.00; 1.01)  |
| Unmarried vs married        | 0.88 (0.81; 0.94)  | 1.07 (1.01; 1.13)  | 1.08 (1.01; 1.15)  | 1.03 (0.97; 1.10)  |
| Divorced vs married         | 1.03 (0.97; 1.09)  | 1.10 (1.05; 1.16)  | 1.16 (1.09; 1.23)  | 1.05 (0.99; 1.13)  |
| Widowed vs married          | 0.94 (0.84; 1.05)  | 1.04 (0.96; 1.12)  | 1.17 (1.10; 1.25)  | 1.13 (1.08; 1.19)  |
| Psychiatric hospitalization | 1.49 (1.39; 1.59)  | 1.46 (1.37; 1.56)  | 1.20 (1.11; 1.29)  | 1.05 (0.96; 1.14)  |
| Education, middle vs low    | 0.97 (0.92; 1.01)  | 0.95 (0.91; 0.99)  | 0.93 (0.89; 0.97)  | 0.90 (0.86; 0.94)  |
| Education, high vs low      | 0.83 (0.79; 0.88)  | 0.82 (0.78; 0.86)  | 0.77 (0.73; 0.82)  | 0.76 (0.71; 0.81)  |
| Income Quartile 2 vs 1      | 0.90 (0.85; 0.96)  |                    |                    |                    |
| Income Quartile 3 vs 1      | 0.84 (0.79; 0.91)  |                    |                    |                    |
| Income Quartile 4 vs 1      | 0.74 (0.69; 0.81)  |                    |                    |                    |
| AIC                         | 83,231.1111        | 89,818.6223        | 73,608.3986        | 75,346.9813        |

Supplementary Table 4b. Adjusted logistic regression analyses representing sensitivity analysis C (Model S2c). Females.

|                             | <b>CHD 45 - 49</b> | <b>CHD 50 - 54</b> | <b>CHD 55 - 59</b> | <b>CHD 60 - 64</b> |
|-----------------------------|--------------------|--------------------|--------------------|--------------------|
|                             | Model S2c          | Model S2c          | Model S2c          | Model S2c          |
| By number of periods        | 1.02 (1.01; 1.04)  | 1.03 (1.02; 1.04)  | 1.02 (1.02; 1.03)  | 1.02 (1.02; 1.03)  |
| Unmarried vs married        | 0.75 (0.63; 0.88)  | 0.73 (0.64; 0.82)  | 0.79 (0.70; 0.88)  | 0.82 (0.74; 0.90)  |
| Divorced vs married         | 0.89 (0.74; 1.07)  | 0.92 (0.82; 1.04)  | 0.91 (0.81; 1.01)  | 0.88 (0.81; 0.95)  |
| Widowed vs married          | 1.57 (0.97; 2.54)  | 1.00 (0.75; 1.35)  | 0.87 (0.71; 1.08)  | 0.97 (0.87; 1.08)  |
| Psychiatric hospitalization | 2.03 (1.70; 2.43)  | 1.66 (1.46; 1.88)  | 1.56 (1.39; 1.74)  | 1.72 (1.59; 1.86)  |
| Education, middle vs low    | 0.77 (0.65; 0.91)  | 0.97 (0.87; 1.08)  | 0.79 (0.72; 0.86)  | 0.88 (0.84; 0.94)  |
| Education, high vs low      | 0.55 (0.45; 0.66)  | 0.73 (0.64; 0.82)  | 0.58 (0.52; 0.64)  | 0.78 (0.72; 0.83)  |
| Income Quartile 2 vs 1      | 0.77 (0.64; 0.91)  | 0.91 (0.81; 1.03)  | 0.83 (0.75; 0.92)  | 0.77 (0.72; 0.83)  |
| Income Quartile 3 vs 1      | 0.61 (0.50; 0.75)  | 0.72 (0.63; 0.83)  | 0.66 (0.58; 0.74)  | 0.65 (0.59; 0.70)  |
| Income Quartile 4 vs 1      | 0.53 (0.43; 0.66)  | 0.58 (0.50; 0.67)  | 0.53 (0.46; 0.60)  | 0.53 (0.48; 0.58)  |
| AIC                         | 13,593.2401        | 27,972.5662        | 34,284.0939        | 62,176.2077        |

  

|                             | <b>CHD 65 - 69</b> | <b>CHD 70 - 74</b> | <b>CHD 75 - 80</b> | <b>CHD 80 - 84</b> |
|-----------------------------|--------------------|--------------------|--------------------|--------------------|
|                             | Model S2c          | Model S2c          | Model S2c          | Model S2c          |
| By number of periods        | 1.02 (1.01; 1.02)  | 1.01 (1.01; 1.02)  | 1.01 (1.01; 1.02)  | 1.01 (1.00; 1.01)  |
| Unmarried vs married        | 0.89 (0.79; 0.99)  | 1.08 (0.99; 1.18)  | 1.01 (0.92; 1.11)  | 1.05 (0.97; 1.13)  |
| Divorced vs married         | 0.99 (0.92; 1.08)  | 1.24 (1.17; 1.31)  | 1.19 (1.11; 1.26)  | 1.17 (1.10; 1.24)  |
| Widowed vs married          | 0.98 (0.89; 1.07)  | 1.15 (1.09; 1.21)  | 1.11 (1.06; 1.16)  | 1.13 (1.09; 1.17)  |
| Psychiatric hospitalization | 1.44 (1.32; 1.58)  | 1.27 (1.17; 1.37)  | 1.40 (1.30; 1.50)  | 1.23 (1.15; 1.31)  |
| Education, middle vs low    | 0.93 (0.88; 0.98)  | 0.92 (0.88; 0.96)  | 0.90 (0.86; 0.94)  | 0.94 (0.90; 0.98)  |
| Education, high vs low      | 0.77 (0.71; 0.83)  | 0.73 (0.68; 0.77)  | 0.79 (0.74; 0.85)  | 0.77 (0.72; 0.82)  |
| Income Quartile 2 vs 1      | 0.87 (0.81; 0.94)  |                    |                    |                    |
| Income Quartile 3 vs 1      | 0.74 (0.67; 0.81)  |                    |                    |                    |
| Income Quartile 4 vs 1      | 0.63 (0.56; 0.71)  |                    |                    |                    |
| AIC                         | 55,335.4706        | 72,995.1727        | 74,453.5558        | 96,306.0740        |
